# Supplementary material
Source: PubMed Central journal article supplement (PMC10638906)
Supplement: NIHMS1928546-supplement-supplement.pdf [file NIHMS1928546-supplement-supplement.pdf]

# Pangenome graph construction from genome alignments with Minigraph-Cactus

---

In the format provided by the authors and unedited

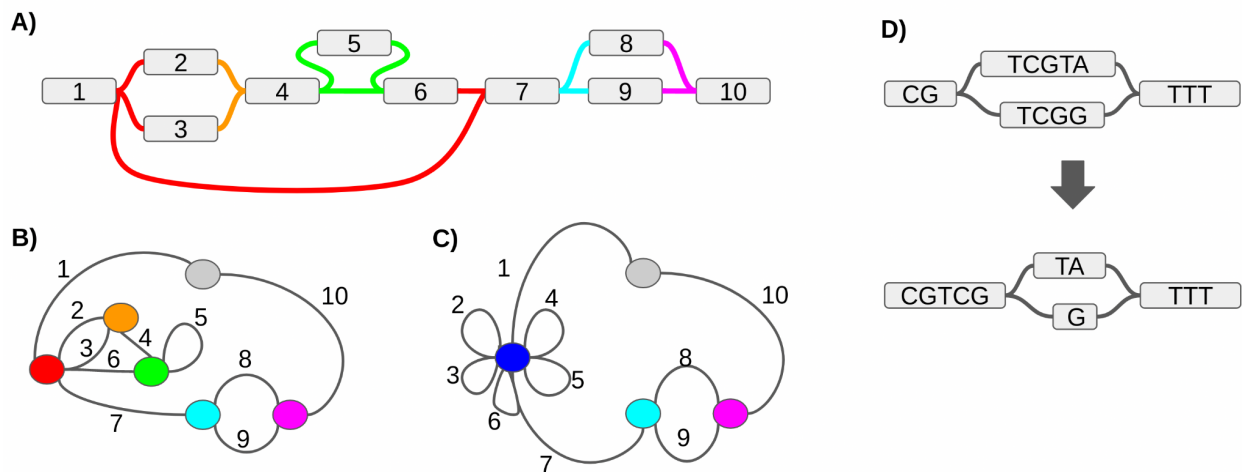

**Supplementary Figure 1: A-C:** Cactus graph example. **A)** A sequence graph where the ID of each node is shown but not its sequence. We consider two edges “connected” if they are incident to the same “end” of the same node. Connected components of edges under this definition are grouped together, with each component being given a separate colour. **B)** Each connected component of edges in the sequence graph is grouped together into a node. Each node in the sequence graph is transformed into an edge. A “root” node (gray) is created to connect to all node ends that have degree 0 in the sequence graph (stubs). **C)** The cactus graph is created by merging together all 3-edge-connected components of nodes in the graph from B). This graph has the property that no edge is part of more than one simple cycle. **D)** 3bp of redundant sequence, “TCG”, is removed with GFAffix. This sequence is redundant in the sense that its removal does not affect the number of possible haplotype sequences that can be represented by the graph.

## Total Graph Sequence

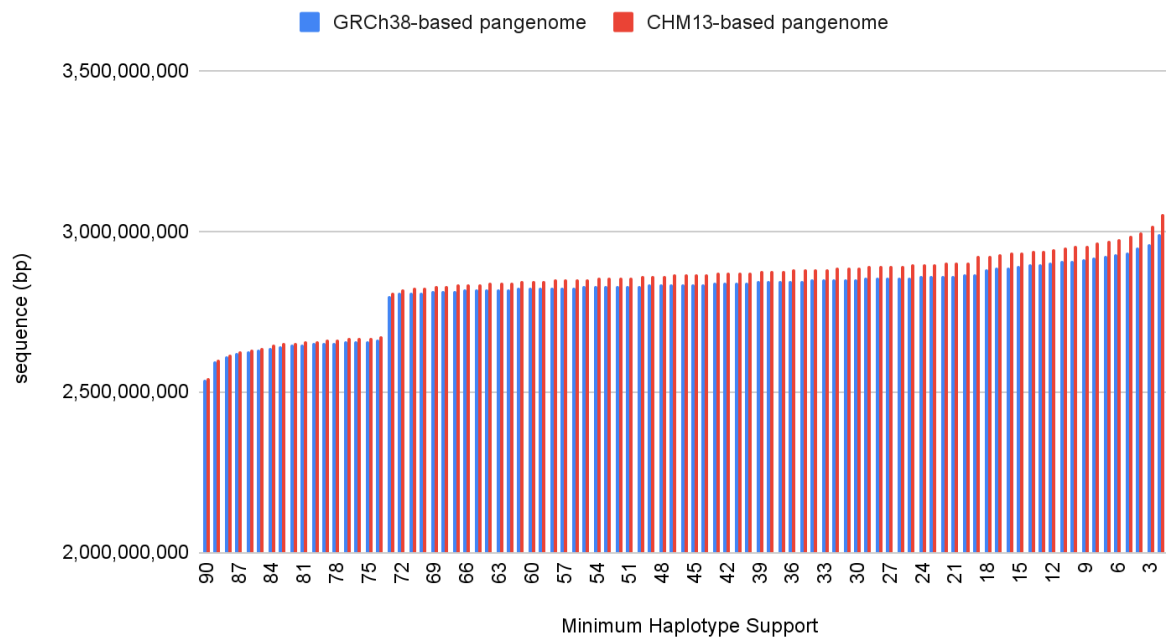

**Supplementary Figure 2:** The amount of sequence in the HPRC graphs by the minimum number of haplotypes that contain it. The step in the graph is due to 14 male haplotypes not possessing an X chromosome.

### GRCh38-HPRC-1.0 graph: Removed Bases

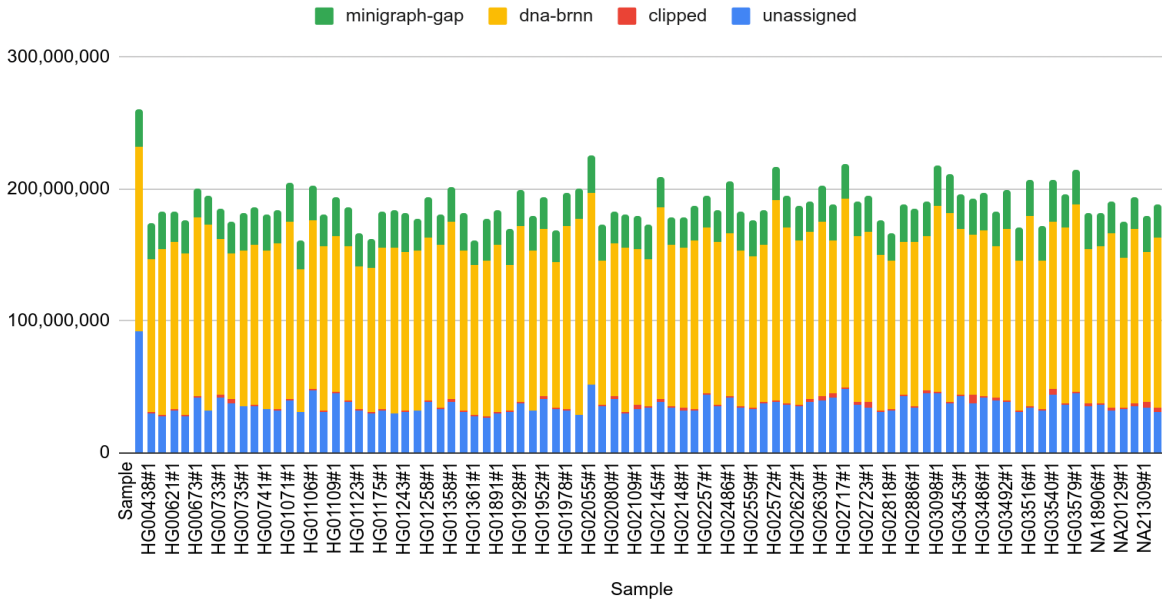

### CHM13-HPRC-1.0 graph: Removed Bases

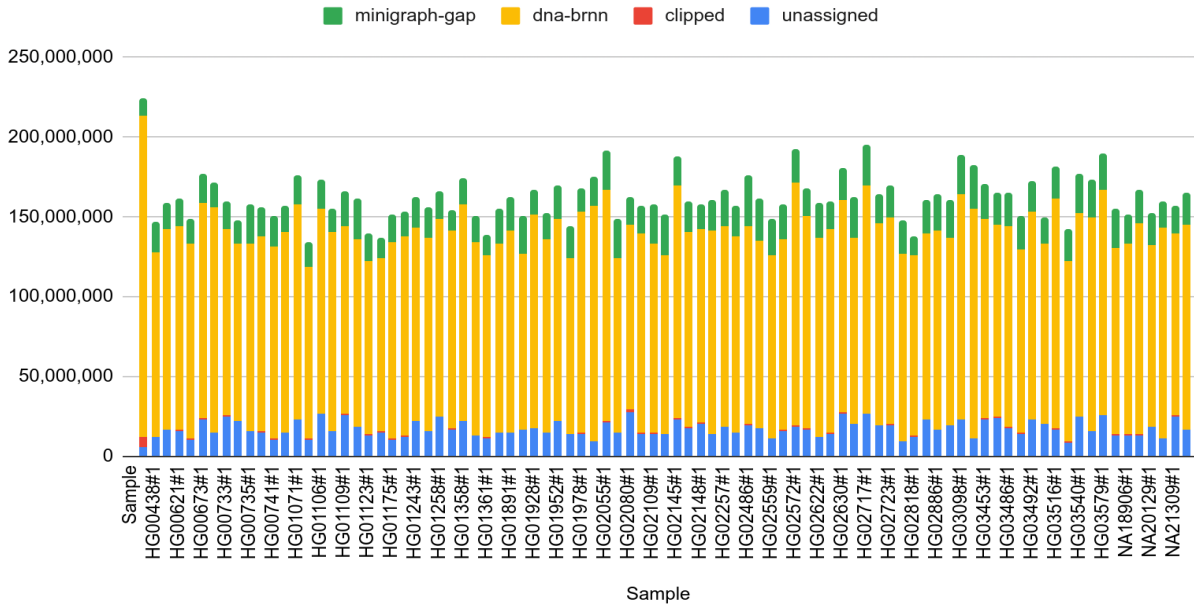

**Supplementary Figure 3:** Sequence excluded from the HPRC pangenome

GRCh38-HPRC graph: Removed Bases

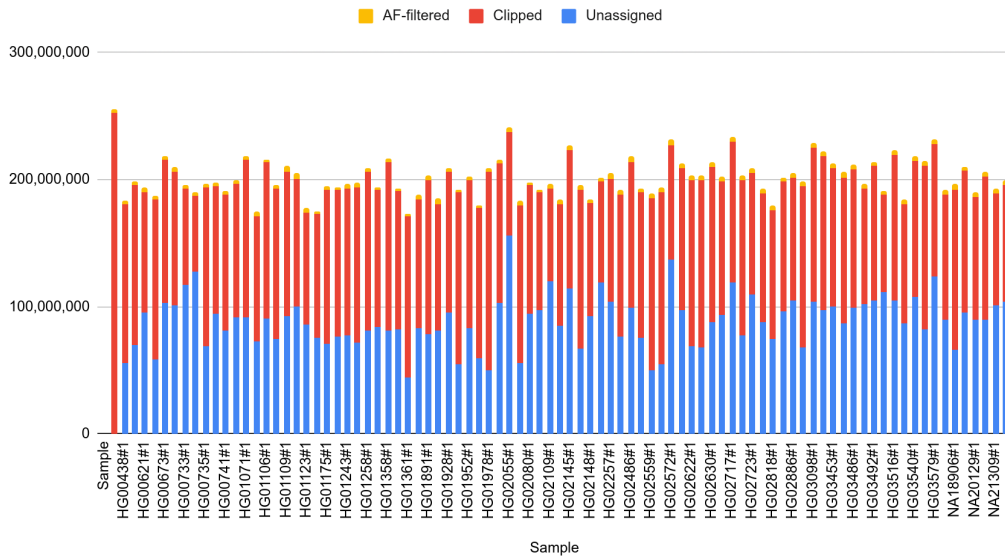

CHM13-HPRC graph: Removed Bases

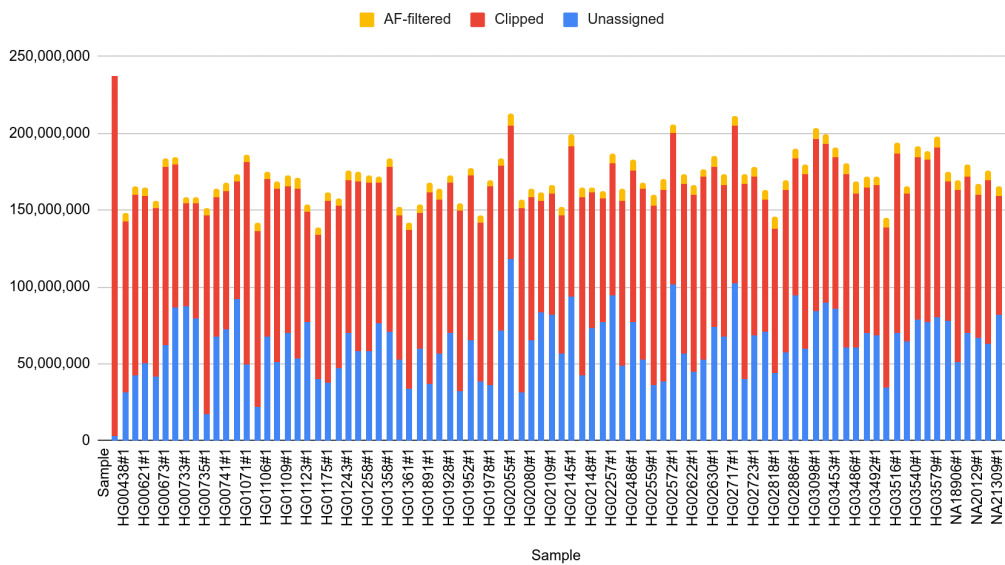

**Supplementary Figure 4:** Sequence excluded from the HPRC pangenomes when using the current pipeline (without dna-brnn preprocessing).

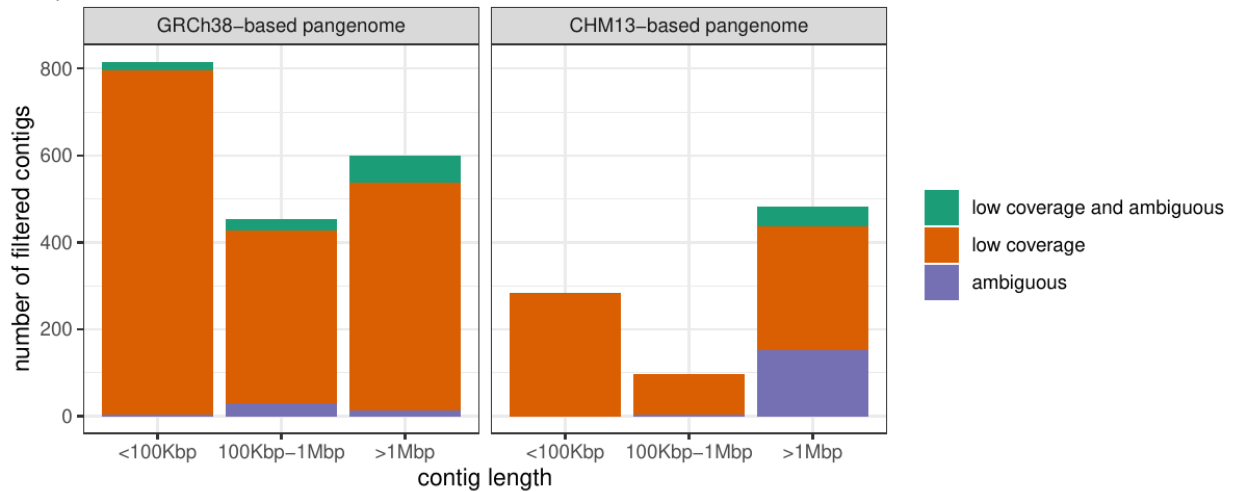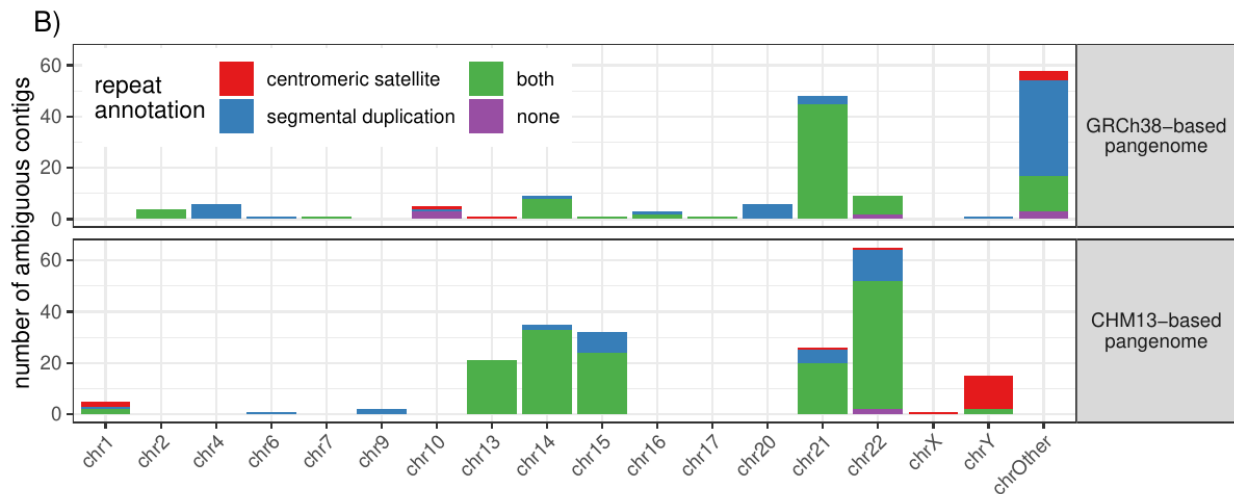

**Supplementary Figure 5:** Characterization of contigs filtered out as low coverage or ambiguous from the HPRC pangenomes (corresponding to the blue bars in **Supplementary Figure 4**).

“chrOther” refers to any unlocalized or unplaced scaffold from GRCh38 (ex.

chr1\_KI270709v1\_random). **A)** Distribution of contigs by size as filtered out by coverage and/or

ambiguity. **B)** The distribution of chromosomes with the highest coverage for each contig that

couldn't be unambiguously assigned to a chromosome. The colors indicate contigs with at least

10% of sequence annotated as segmental duplication (blue), centromeric satellite (red), or both

(green). The annotation tracks for each assembly, released as part of Liao et al., 2022, were

produced with SEDEF and dna-brnn, for segmental duplications and centromeric satellites

respectively.

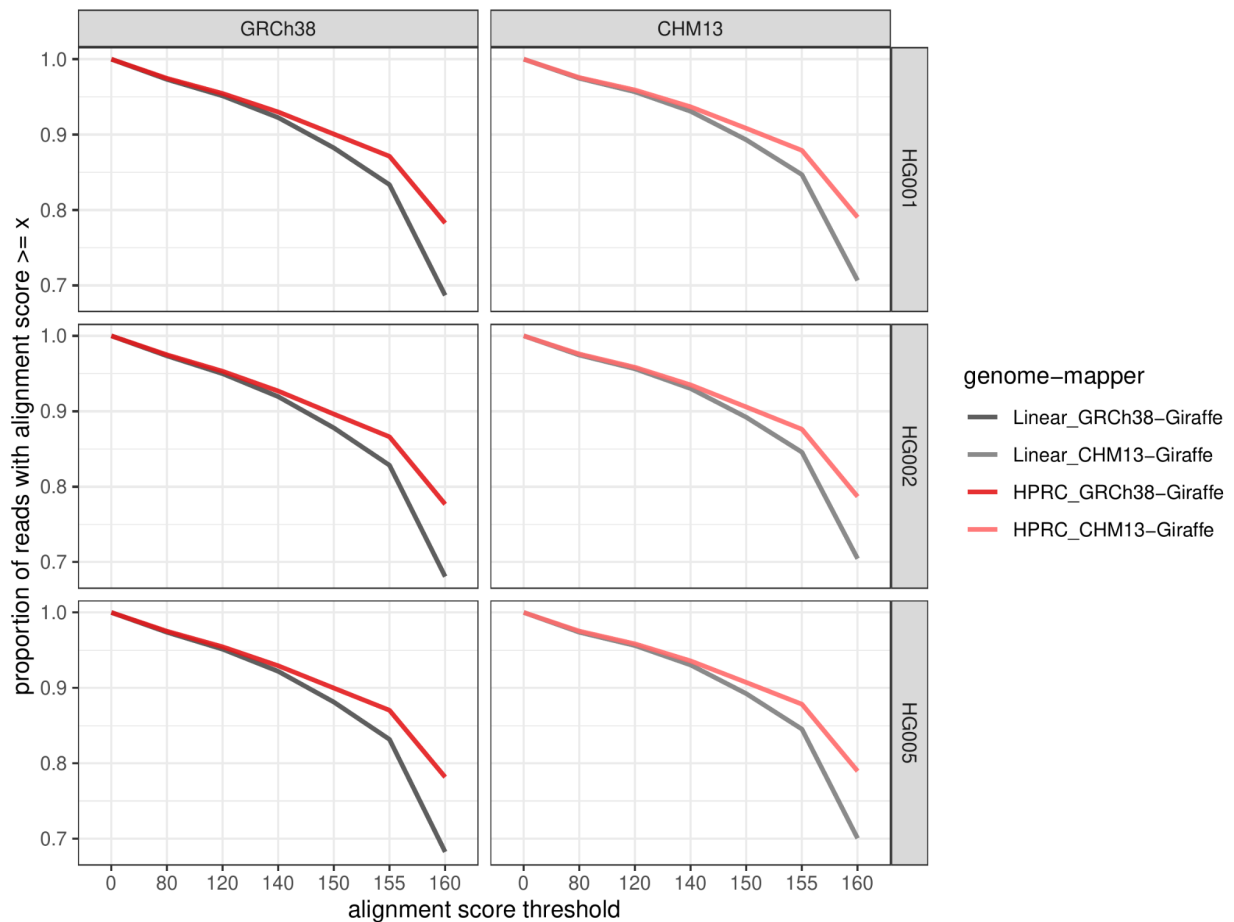

**Supplementary Figure 6:** ~30x Illumina short-reads for three GIAB samples (horizontal panels) were mapped using two approaches: vg Giraffe on the linear pangenomes with just the reference genome (greys), and vg Giraffe on the HPRC pangenome (reds). The left panels compare GRCh38-referenced pangenomes, the right panels compare CHM13-referenced pangenomes. The curves show the proportion of reads (y-axis) with an alignment score greater or equal to the threshold defined by the x-axis.

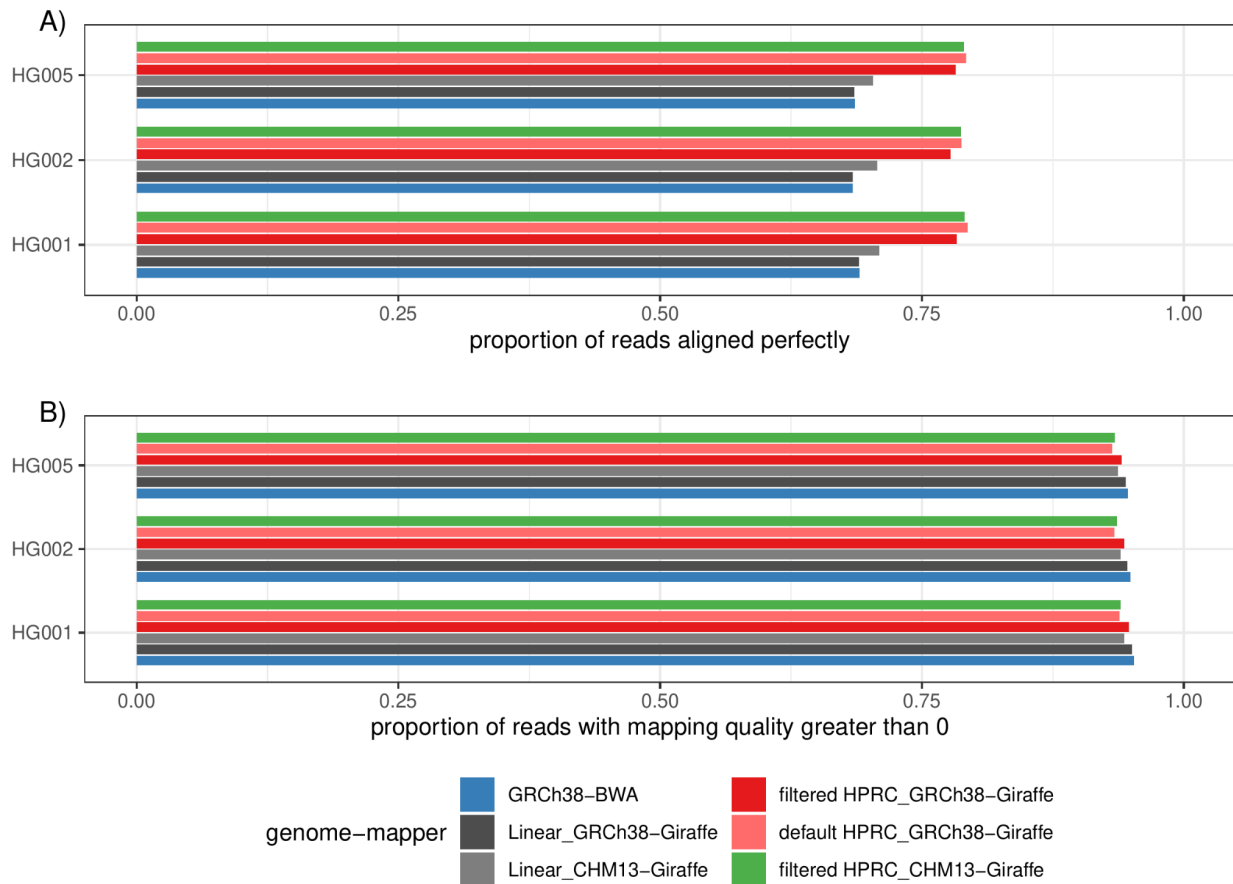

**Supplementary Figure 7:** ~30x Illumina short-reads for three GIAB samples were mapped using three approaches: BWAMEM on GRCh38 (blue), vg Giraffe on the linear pangenomes with GRCh38 or CHM13 (grey), vg Giraffe on the GRCh38-referenced or CHM13-referenced HPRC pangenomes (red and green). The darker red bar corresponds to the default GRCh38-based HPRC pangenome, while the lighter red to the frequency-filtered pangenome used in practice for read mapping and variant calling. A) Proportion of the reads aligning perfectly to the (pan-)genome for each sample (y-axis). B) Proportion of reads with a mapping quality greater than 0.



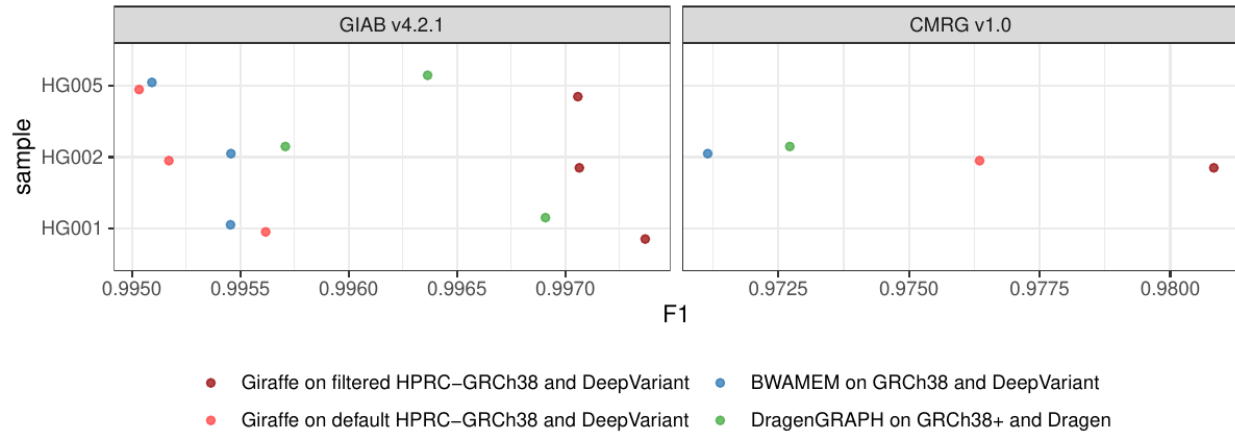

**Supplementary Figure 8:** Evaluation of calls made on both the default pangenome (light red) and the frequency-filtered pangenome (dark red). The results when aligning reads with BWAMEM (blue) or using the Dragen pipeline (green) are also shown. The F1 score is shown on the x-axis across samples from the Genome in a Bottle (y-axis). Left: Genome in a Bottle v4.2.2 truth set. Right: Challenging Medically Relevant Genes v1.0 truth set.

## Variant Calling Accuracy

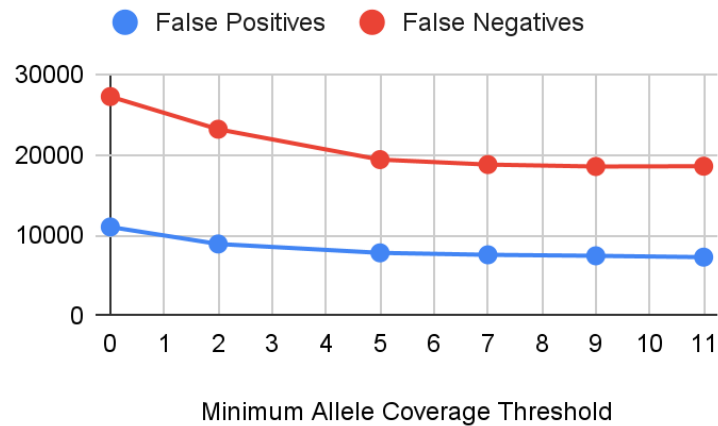

**Supplementary Figure 9:** Variant calling false positives and false negatives on 30X Genome in a Bottle v4.2.1 Illumina reads for HG003 for the CHM13-based pangenome as a function of the allele frequency filtering threshold used. The 0 column is the unfiltered graph and the 9 column is the 10% (9/10) filter used for all other short-read mapping experiments. The accuracy was measured using `rtg vcfeval v3.91` on the evaluation regions provided by GIAB for this sample. The truth set has 3,831,915 calls total.

## Giraffe Mapping Speed

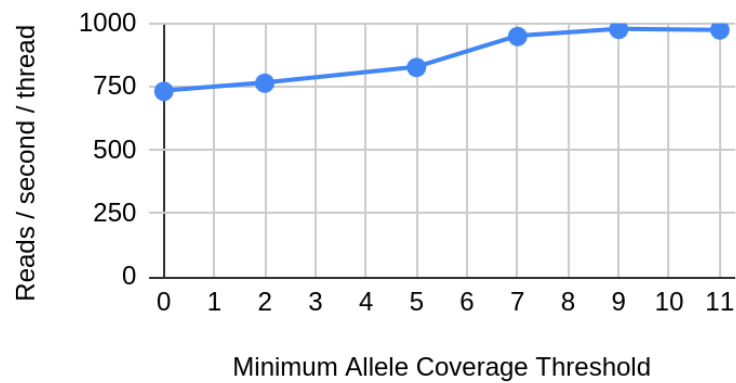

**Supplementary Figure 10:** Short read mapping speed on 30X Genome in a Bottle v4.2.1

Illumina reads for HG003 for the CHM13-based pangenome as a function of the allele frequency filtering threshold used, as reported by `vg giraffe`. The 0 column is the unfiltered graph and the 9 column is the 10% (9/90) filter used for all other short-read mapping experiments.

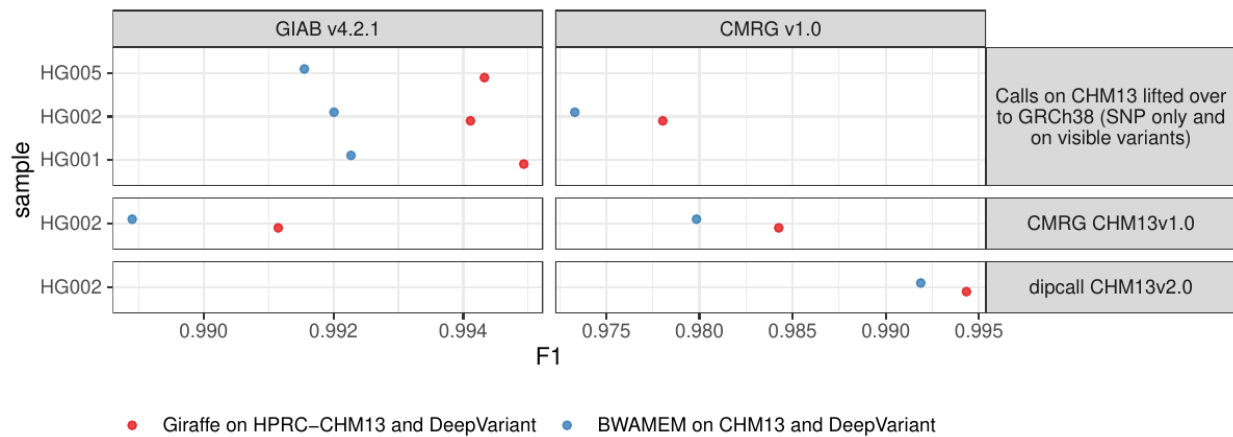

**Supplementary Figure 11:** Evaluation of calls made on CHM13: aligning reads with BWAMEM (blue), or to the CHM13-based HPRC pangenome and projecting them to CHM13 (red). The F1 score is shown on the x-axis across samples from the Genome in a Bottle (y-axis). Left: Genome in a Bottle v4.2.2 truth set. Right: Challenging Medically Relevant Genes v1.0 truth set. Three approaches are shown as horizontal panels. Top: variants called on CHM13 were lifted over to be evaluated against the GRCh38 truth sets. Only SNPs and variant that are visible (not homozygous for the reference allele) on both reference genomes were used. Middle: the CMRG truth set for CHM13 v1.0 was lifted to CHM13 v2.0. The whole genome evaluation (left) was limited to the GIAB v4.2.1 confident regions lifted from GRCh38 to CHM13. Bottom: Preliminary draft truth set for CHM13 v2.0 based on HiFi assemblies analyzed with dipcall.

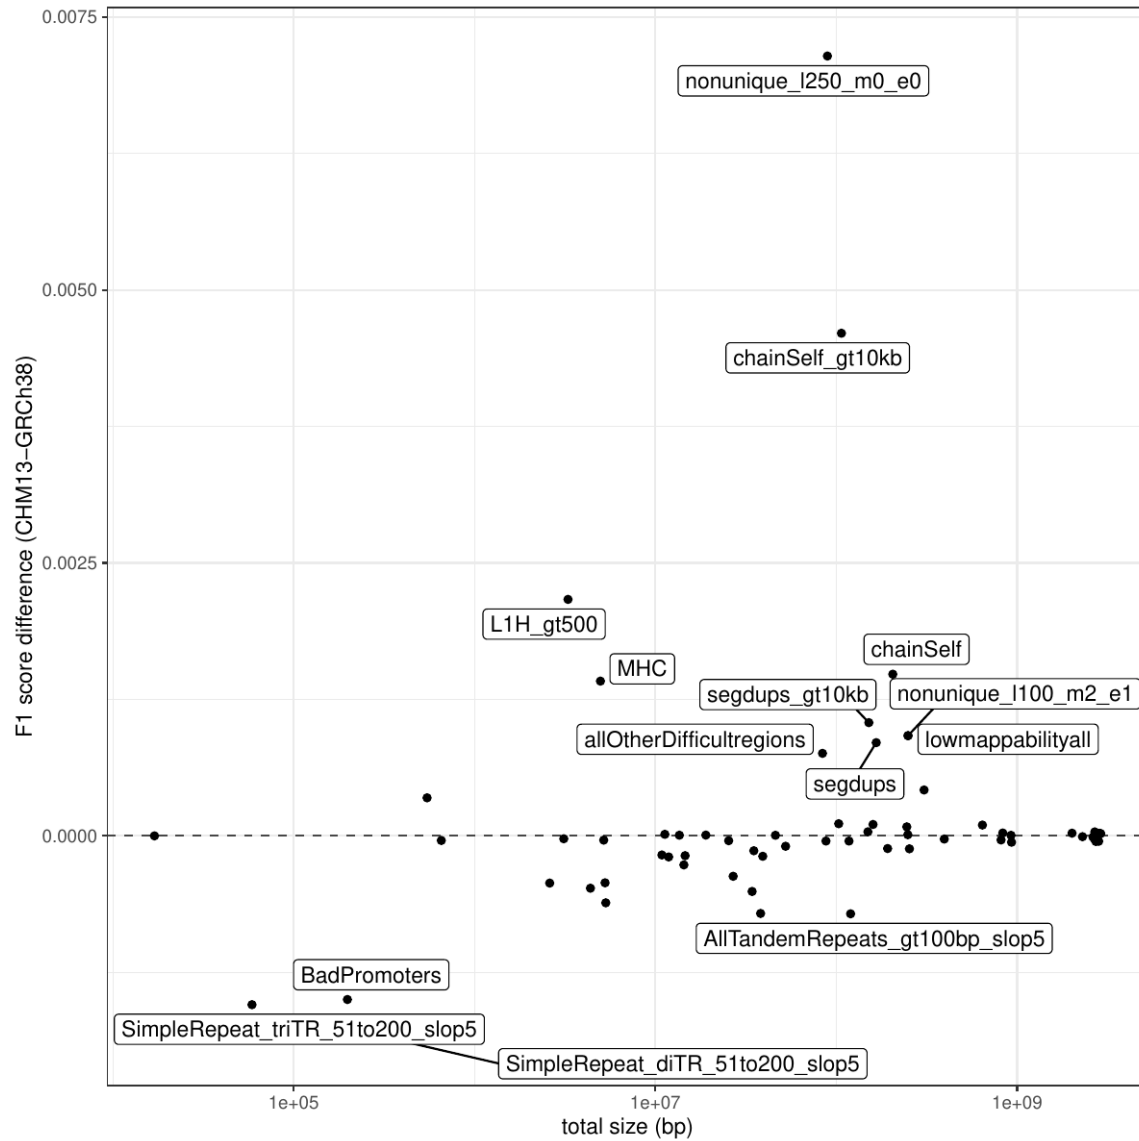

**Supplementary Figure 12:** Difference between the F1 score obtained when using the CHM13-based pangenome compared to the GRCh38-based pangenome (y-axis), stratified by region sets from the GIAB (points). The total amount of sequence that represents each region set is shown on the x-axis. The top 10 most regions with the largest differences are labeled.

Cumulative graph length by sample coverage

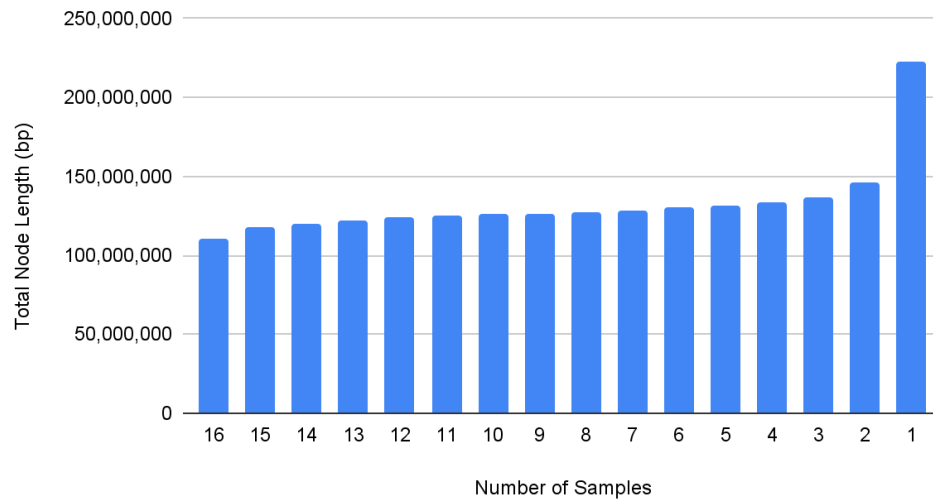

**Supplementary Figure 13:** The amount of sequence in the *D. melanogaster* graph by the minimum number of haplotypes that contain it.

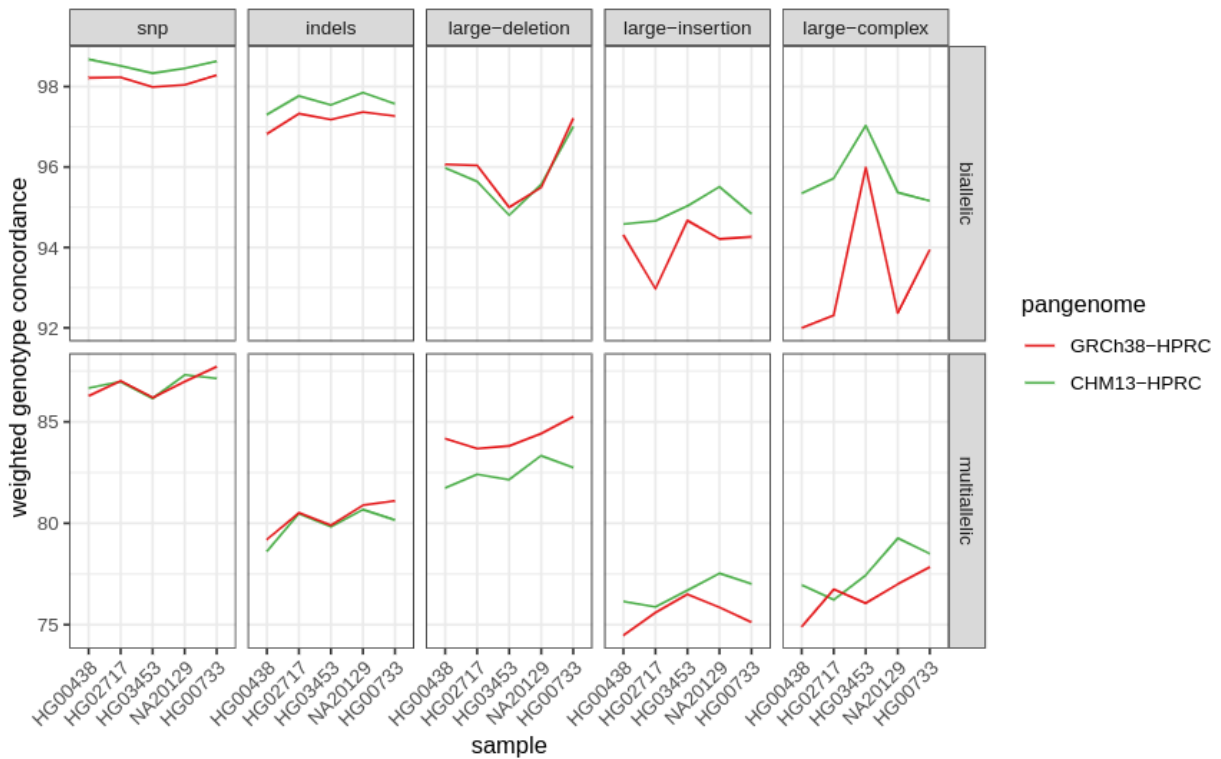

**Supplementary Figure 14:** Leave-one-out PanGenie experiments comparing the GRCh38 and CHM13-based HPRC graphs across the same five samples. Each of the samples was, in turn, removed along with all its private variants from the input VCF to PanGenie then genotyped from short reads. The Weighted Genotype Concordance was computed between the computed and original genotypes for each sample, excluding variants that were private (and therefore could not be re-genotyped). This is thus a comparison of the haplotypes as computed by PanGenie with those from the original assemblies within the context of the pangenome graph. Measurements are separated by variation category, as well as between bi-allelic and multi-allelic sites in the graph.

## Non-reference nodes by sample coverage

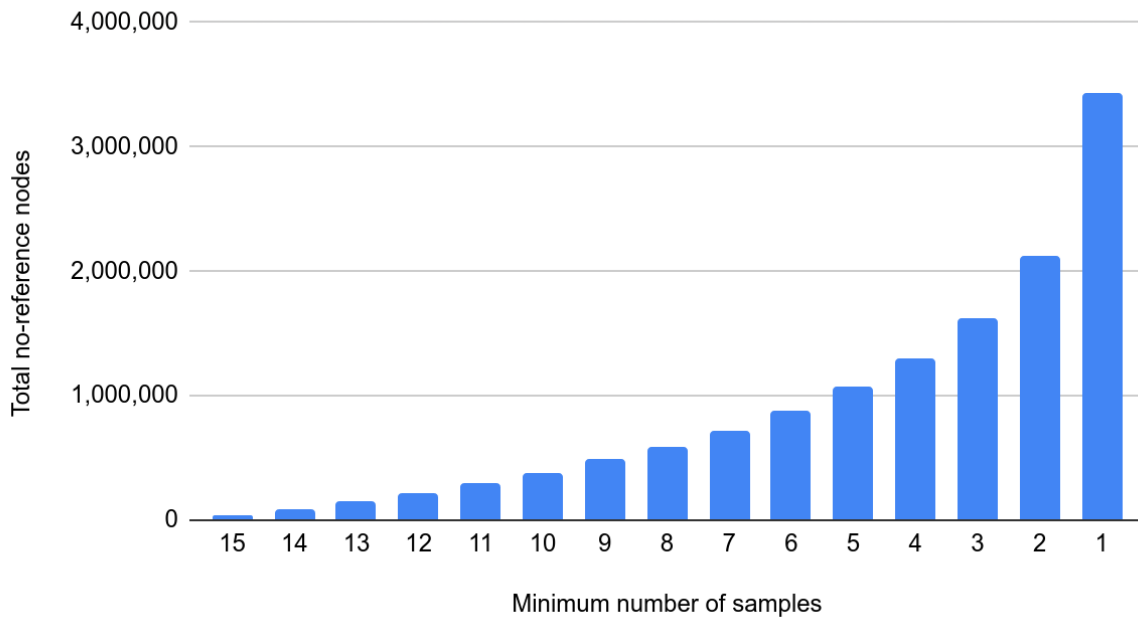

**Supplementary Figure 15:** The number of nodes not present in dm6 covered by at least the given number of samples.



# Snarl depth distribution

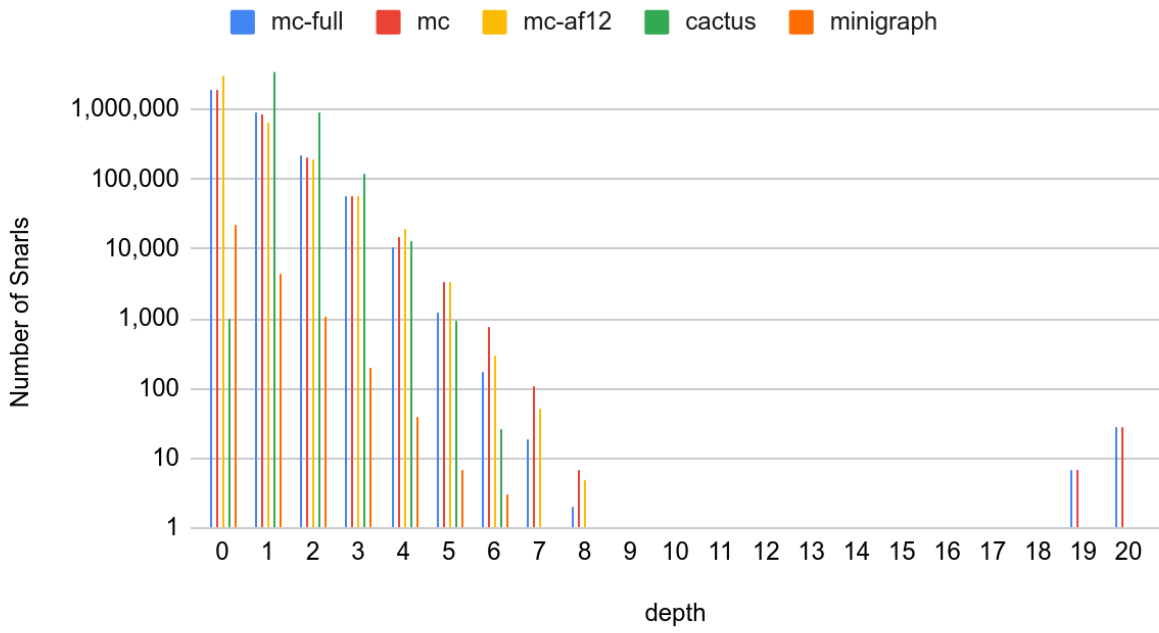

Supplementary Figure 16: Snarl depth distribution.

## Unassigned, Clipped and AF-Filtered

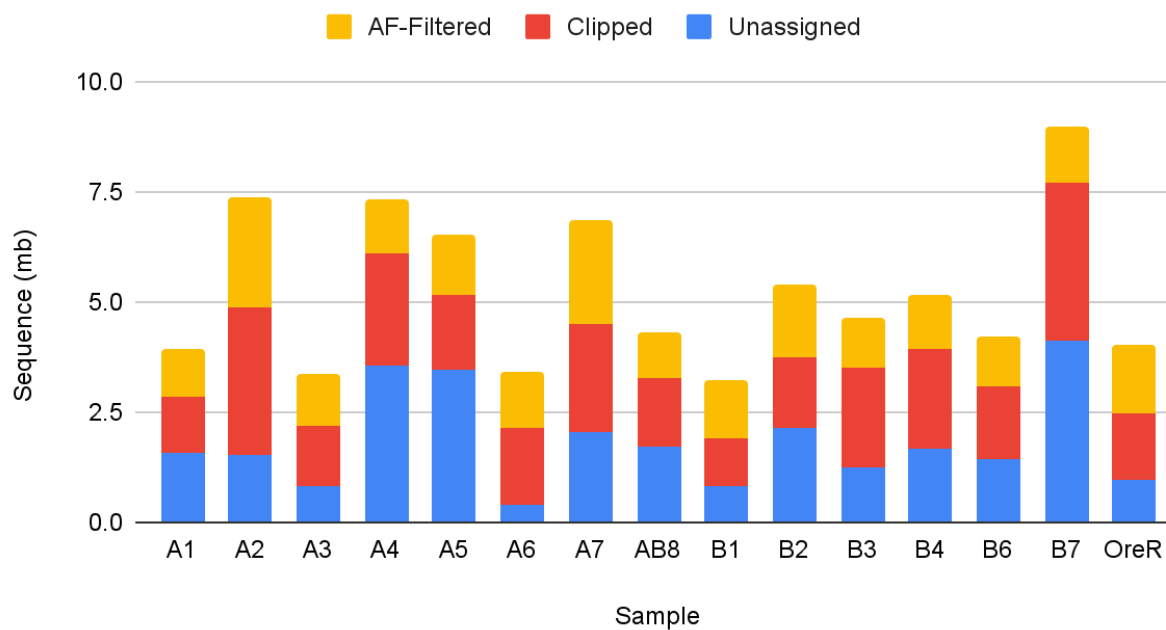

**Supplementary Figure 17:** Sequence excluded from the *D. melanogaster* pangenome.

A)

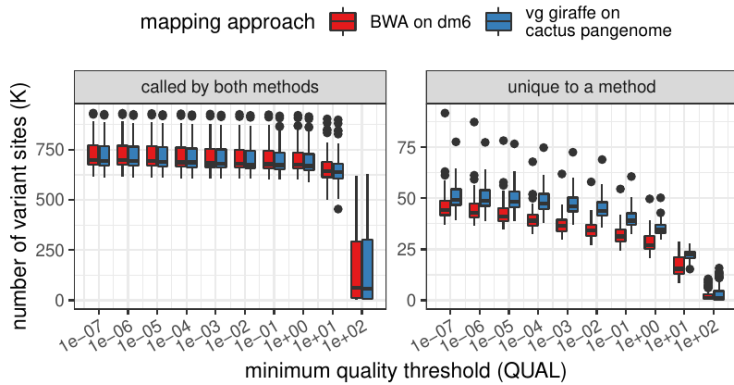

B) Quality of at least 0.1

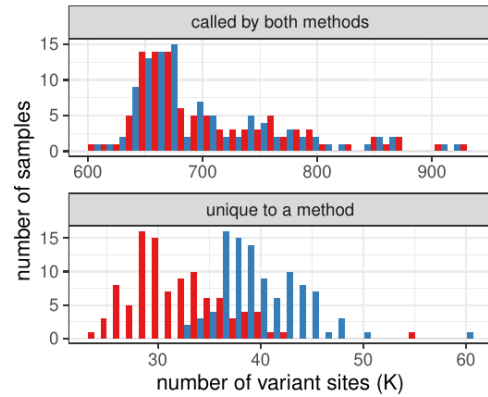

C)

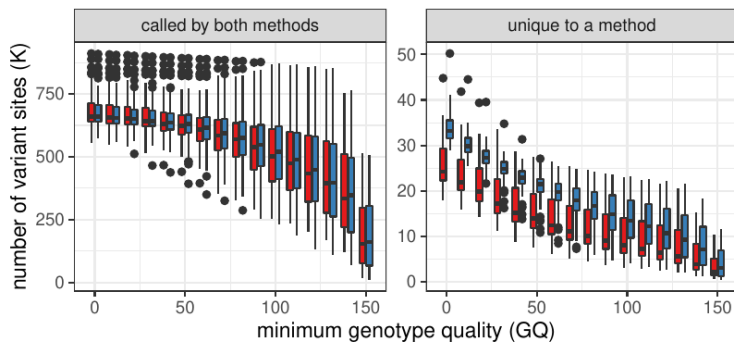

D) Genotype quality of at least 10

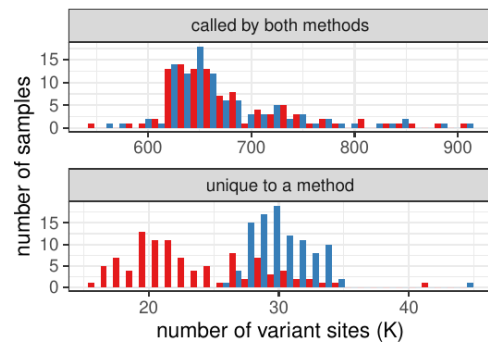

**Supplementary Figure 18:** Number of variant sites with an alternate allele called in each of the 100 samples with FreeBayes. Two mapping approaches are compared: short-reads mapped to dm6 using BWA-MEM (red); short-reads mapped to the pangenome using vg Giraffe (blue). The variant sites were split into sites found by both approaches and sites found only by one. The boxplots in **A)** and **C)** show the median (center line), upper and lower quartiles (box limits), up to 1.5x interquartile range (whiskers), and outliers (points). **A)** Distribution of the number of variant sites for different minimum quality (QUAL field) (x-axis). **B)** Only variant sites with a quality of at least 0.1 were counted. This corresponds to  $x=0.1$  in **A)**. **C)** Distribution of the number of variant sites for different minimum genotype quality (GQ field) (x-axis). **D)** Only variant sites with a genotype quality of at least 10 were counted. This corresponds to  $x=10$  in **C)**.

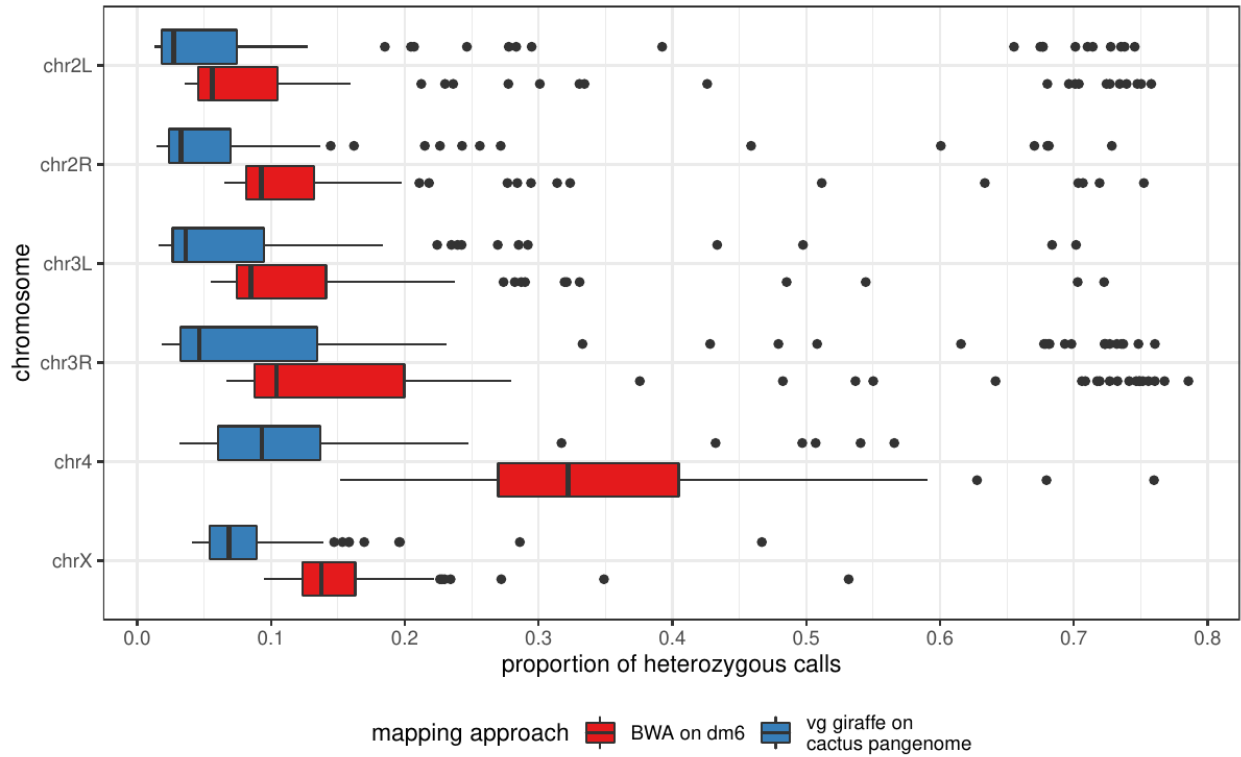

**Supplementary Figure 19:** Proportion of heterozygous small variants called by FreeBayes in each of the 100 fly samples (point). Reads were either aligned to the pangenome and projected to dm6 (blue), or mapped to dm6 with BWA-MEM (red). Due to the inbreeding of these lines, we expect low heterozygosity. The boxplots show the median (center line), upper and lower quartiles (box limits), up to 1.5x interquartile range (whiskers), and outliers (points).

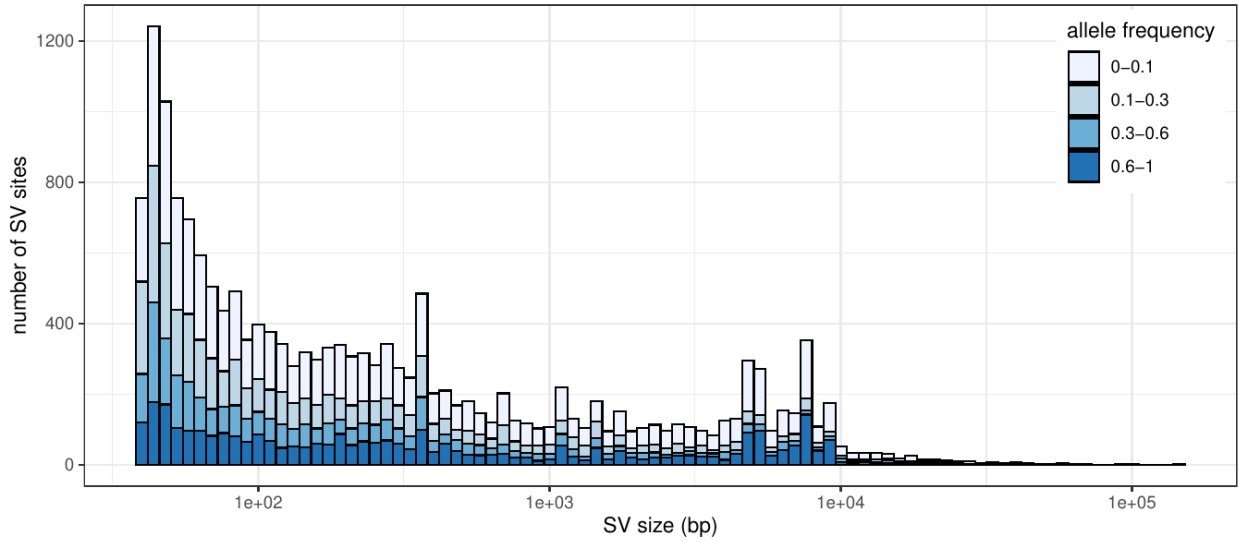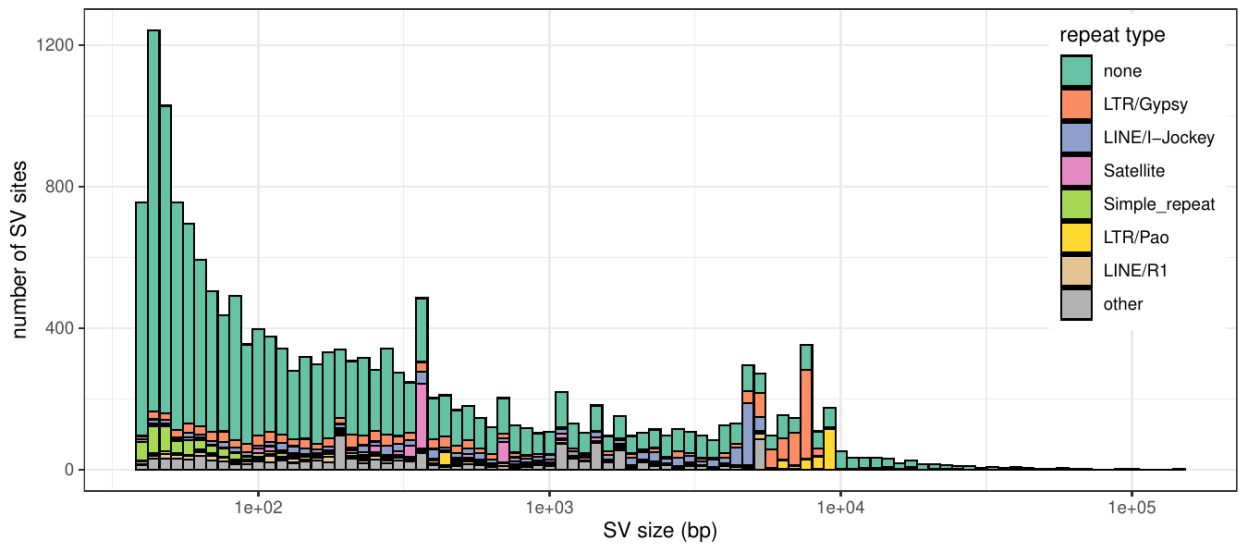

**Supplementary Figure 20:** Distribution of the size of the SVs genotyped across 100 fly samples. The x-axis is log-scaled. **Top:** The SVs are colored by their allele frequencies. **Bottom:** The SVs are colored by the repeat class as annotated by Repeat Masker.

| Graph                                           | Nodes      | Edges       | Total Node Length | Total Non-ref Node Length | Total Path Length |
|-------------------------------------------------|------------|-------------|-------------------|---------------------------|-------------------|
| SV Graph (GRCh38)                               | 424,643    | 637,628     | 3,239,764,787     | 140,014,069               | 3,239,764,787     |
| SV Graph (CHM13)                                | 493,631    | 738,529     | 3,365,688,482     | 253,629,026               | 3,365,688,482     |
| GRCh38-based Pangenome                          | 81,751,614 | 113,258,931 | 3,287,932,785     | 188,182,067               | 254,821,009,311   |
| GRCh38-based Filtered Pangenome (AF $\geq$ 10%) | 59,960,908 | 72,408,601  | 3,153,443,019     | 53,692,301                | 254,415,272,646   |
| CHM13-based Pangenome                           | 85,591,995 | 118,409,526 | 3,324,657,754     | 212,598,298               | 257,143,252,360   |
| CHM13-based Filtered Pangenome (AF $\geq$ 10%)  | 62,335,399 | 75,270,997  | 3,166,744,316     | 54,684,860                | 256,673,009,341   |

**Supplementary Table 1:** HPRC graph sizes. The total node length is the sum of the lengths of all nodes in the graph. The total “non-ref” node length is the sum of the lengths of all nodes that are not present in any reference path, i.e. excluding CHM13 paths from the CHM13-based graph and GRCh38 paths from the GRCh38-based graph. The total path length is the sum of all paths in the graph, which will correspond exactly to the total length of all contigs input into the construction procedure, minus any sequence clipped out or unassignable to a chromosome.

| <b>Graph</b>                 | <b>Nodes</b> | <b>Edges</b> | <b>Total Node Length</b> | <b>Total Non-ref Node Length</b> | <b>Total Path Length</b> |
|------------------------------|--------------|--------------|--------------------------|----------------------------------|--------------------------|
| SV Graph                     | 80,853       | 112,742      | 214,547,800              | 71,326,590                       | 214,547,800              |
| Unclipped Pangenome          | 9,042,502    | 12,364,039   | 251,857,504              | 251,857,504                      | 2,182,961,082            |
| Pangenome                    | 8,978,195    | 12,276,452   | 223,071,144              | 223,071,144                      | 2,152,888,069            |
| Filtered Pangenome (AF12.5%) | 7,686,219    | 9,788,690    | 202,497,872              | 202,497,872                      | 2,131,677,729            |
| Progressive Cactus Graph     | 12,974,720   | 17,684,675   | 470,148,493              | 470,148,493                      | 2,216,588,031            |

**Supplementary Table 2:** *D. Melegonaster* graph sizes. The total node length is the sum of the lengths of all nodes in the graph. The total “non-ref” node length is the sum of the lengths of all nodes that are not present in any dm6 path. The total path length is the sum of all paths in the graph, which will correspond exactly to the total length of all contigs input into the construction procedure, minus any sequence clipped out or unassignable to a chromosome.

| Variant type | HPRC-CHM13                     |                                   |                   | HPRC-GRCh38                    |                                   |                   |
|--------------|--------------------------------|-----------------------------------|-------------------|--------------------------------|-----------------------------------|-------------------|
|              | # alleles in biallelic regions | # alleles in multiallelic regions | # alleles total   | # alleles in biallelic regions | # alleles in multiallelic regions | # alleles total   |
| SNPs         | 18,489,918                     | 1,997,181                         | <b>20,487,099</b> | 18,392,518                     | 1,801,599                         | <b>20,194,117</b> |
| Indels       | 2,248,578                      | 4,731,607                         | <b>6,980,185</b>  | 2,250,931                      | 4,597,184                         | <b>6,848,115</b>  |
| SV-DEL       | 4,270                          | 66,440                            | <b>70,710</b>     | 4,232                          | 52,969                            | <b>57,201</b>     |
| SV-INS       | 12,384                         | 187,443                           | <b>199,827</b>    | 12,192                         | 242,420                           | <b>254,612</b>    |
| SV-Others    | 1,382                          | 90,766                            | <b>92,148</b>     | 1,296                          | 100,700                           | <b>101,996</b>    |
| Variant type | HPRC-CHM13                     |                                   |                   |                                |                                   |                   |
|              | # alleles in biallelic regions | # alleles in multiallelic regions | # alleles total   |                                |                                   |                   |
| SNPs         | 18,489,918                     | 1,997,181                         | <b>20,487,099</b> |                                |                                   |                   |
| Indels       | 2,248,578                      | 4,731,607                         | <b>6,980,185</b>  |                                |                                   |                   |
| SV-DEL       | 4,270                          | 66,440                            | <b>70,710</b>     |                                |                                   |                   |
| SV-INS       | 12,384                         | 187,443                           | <b>199,827</b>    |                                |                                   |                   |
| SV-Others    | 1,382                          | 90,766                            | <b>92,148</b>     |                                |                                   |                   |

**Supplementary Table 3:** Number of variants in graphs genotyped by PanGenie. These statistics are obtained from the VCF after preprocessing by PanGenie. Indels are small events



| Phase                                          | Dm6 (hours) | hprc-v1.0<br>grch38 (hours) | hprc-v1.0<br>chm13 (hours) | hprc grch38<br>(new pipeline)<br>(hours) | hprc chm13<br>(new pipeline)<br>(hours) |
|------------------------------------------------|-------------|-----------------------------|----------------------------|------------------------------------------|-----------------------------------------|
| Minigraph<br>construction                      | 3.02        | 45.43                       | 39.82                      | 45.82                                    | 21.4                                    |
| Minigraph<br>mapping                           | 1.01        | 3.14                        | 4.52                       | 1.93                                     | 1.58                                    |
| Split by<br>chromosome                         | 0.11        | 1.6                         | 2.1                        | 1.67                                     | 1.43                                    |
| Cactus<br>alignment                            | 0.43        | 11.56                       | 7.66                       | 5.04                                     | 5.27                                    |
| Indexing and<br>clipping (full<br>graph)       | 0.13        | N/A                         | N/A                        | 4.37                                     | 4.68                                    |
| Indexing and<br>clipping<br>(clipped<br>graph) | 0.26        | 10.02                       | 10.98                      | 3.17                                     | 4.32                                    |
| Indexing and<br>clipping<br>(AF12.5%<br>graph) | 0.16        | 10.81*                      | 10.75*                     | 3.42                                     | 4.23                                    |
| <b>Total</b>                                   | 5.12        | 71.75                       | 75.83                      | 65.42                                    | 42.91                                   |

**Supplementary Table 4:** Minigraph-Cactus running times (wall-times). The “new pipeline” columns refer to graphs made using the method described here which does not rely on dna-brnn for clipping. The dm6 graphs were made using up to 32 cores and 16Gb RAM. The HPRC graphs were made on an AWS cluster using up to 25 32 core 256Gb RAM machines, except for the indexing stages which were done on up to 2 64 core 512Gb RAM machines. The disk usage of each step is bounded by the total size of the input and output (plus uncompressed versions of the same if they are gzipped).

\* *These values were not kept in the logs and were estimated using the ratios in the neighboring columns (ex  $10.81 = 3.42/3.17 * 10.02$ ).*

| <b>Phase</b>                      | <b>Dm6 (hours)</b> |
|-----------------------------------|--------------------|
| <b>Lastz repeatmasking</b>        | 0.38               |
| <b>All-to-all lastz alignment</b> | 17.97              |
| <b>Cactus alignment</b>           | 0.83               |
| <b>Total</b>                      | 19.18              |

**Supplementary Table 5:** Progressive Cactus running times (wall times) using single 32-core machine with up to 64Gb RAM.

| DGRP Line | Sequencing Technology | Freeze | Mapped Coverage | Raw Read Length:Read Number | NCBI SRA  | NCBI SRR  |
|-----------|-----------------------|--------|-----------------|-----------------------------|-----------|-----------|
| DGRP_21   | Illumina              | F1     | 15.8            | 95bp:37046984               | SRX021040 | SRR834526 |
| DGRP_31   | Illumina              | F2     | 49.2            | 125bp:76894692              | SRX155996 | SRR834509 |
| DGRP_32   | Illumina              | F2     | 56.2            | 125bp:88154526              | SRX155997 | SRR834512 |
| DGRP_38   | Illumina              | F1     | 28.0            | 95bp:56154204               | SRX025317 | SRR834541 |
| DGRP_40   | Illumina              | F1     | 33.3            | 95bp:69063428               | SRX021235 | SRR835025 |
| DGRP_42   | Illumina              | F1     | 20.2            | 95bp:37186556               | SRX021255 | SRR835027 |
| DGRP_48   | Illumina              | F2     | 32.7            | 125bp:58419132              | SRX155989 | SRR835034 |
| DGRP_49   | Illumina              | F1     | 15.2            | 75bp:37870818               | SRX021267 | SRR835037 |
| DGRP_57   | Illumina              | F1     | 32.6            | 100bp:64966990              | SRX021296 | SRR933581 |
| DGRP_75   | Illumina              | F1     | 18.5            | 110bp:38161744              | SRX021384 | SRR835087 |
| DGRP_83   | Illumina              | F1     | 16.3            | 75bp:41070470               | SRX023456 | SRR835058 |
| DGRP_100  | Illumina              | F2     | 52.3            | 125bp:87340978              | SRX156026 | SRR833244 |
| DGRP_138  | Illumina              | F1     | 30.1            | 100bp:61689820              | SRX021008 | SRR932121 |
| DGRP_142  | Illumina              | F1     | 19.7            | 110bp:41167794              | SRX020759 | SRR834551 |
| DGRP_177  | Illumina              | F1     | 24.6            | 95bp:49114764               | SRX021026 | SRR834547 |
| DGRP_181  | Illumina              | F1     | 24.7            | 75bp:64093862               | SRX020912 | SRR933563 |
| DGRP_189  | Illumina              | F2     | 37.8            | 125bp:63289120              | SRX155979 | SRR834523 |
| DGRP_223  | Illumina              | F2     | 40.8            | 125bp:71152512              | SRX155994 | SRR834527 |
| DGRP_235  | Illumina              | F1     | 18.4            | 95bp:38296004               | SRX021053 | SRR834531 |
| DGRP_318  | Illumina              | F1     | 15.2            | 75bp:39068236               | SRX021082 | SRR834507 |
| DGRP_319  | Illumina              | F2     | 37.6            | 125bp:70621686              | SRX155981 | SRR834508 |
| DGRP_320  | Illumina              | F1     | 24.2            | 95bp:51875680               | SRX021063 | SRR834510 |
| DGRP_321  | Illumina              | F1     | 33.5            | 95bp:67314152               | SRX021094 | SRR834511 |
| DGRP_332  | Illumina              | F1     | 25.7            | 75bp:65583082               | SRX021095 | SRR933569 |
| DGRP_348  | Illumina              | F2     | 48.3            | 125bp:78515972              | SRX156029 | SRR834514 |
| DGRP_352  | Illumina              | F1     | 15.6            | 75bp:44982388               | SRX021101 | SRR834516 |
| DGRP_354  | Illumina              | F2     | 57.2            | 101bp:106369344             | SRX156027 | SRR834517 |
| DGRP_355  | Illumina              | F2     | 44.9            | 101bp:84541222              | SRX156028 | SRR834545 |
| DGRP_356  | Illumina              | F1     | 15.5            | 75bp:42903612               | SRX023833 | SRR834537 |
| DGRP_359  | Illumina              | F1     | 20.2            | 95bp:37271884               | SRX023424 | SRR834546 |

|          |          |    |      |                |           |           |
|----------|----------|----|------|----------------|-----------|-----------|
| DGRP_361 | Illumina | F2 | 40.6 | 125bp:68254340 | SRX155984 | SRR834553 |
| DGRP_370 | Illumina | F1 | 20.9 | 95bp:43793604  | SRX021104 | SRR834539 |
| DGRP_377 | Illumina | F1 | 21.8 | 95bp:43796182  | SRX023834 | SRR834543 |
| DGRP_381 | Illumina | F1 | 20.9 | 75bp:54335852  | SRX021112 | SRR933573 |
| DGRP_382 | Illumina | F2 | 41.1 | 125bp:73812254 | SRX156013 | SRR834552 |
| DGRP_383 | Illumina | F1 | 19.1 | 95bp:39897030  | SRX021113 | SRR834554 |
| DGRP_390 | Illumina | F2 | 26.2 | 125bp:42709922 | SRX156014 | SRR834519 |
| DGRP_392 | Illumina | F1 | 23.2 | 95bp:51156860  | SRX021157 | SRR834520 |
| DGRP_395 | Illumina | F2 | 47.1 | 101bp:87233368 | SRX156015 | SRR834521 |
| DGRP_397 | Illumina | F2 | 30.0 | 125bp:48910026 | SRX156017 | SRR834522 |
| DGRP_405 | Illumina | F1 | 22.9 | 95bp:50080536  | SRX021242 | SRR835023 |
| DGRP_406 | Illumina | F1 | 25.0 | 95bp:51821248  | SRX021254 | SRR835024 |
| DGRP_426 | Illumina | F1 | 21.1 | 95bp:43746634  | SRX021245 | SRR835026 |
| DGRP_427 | Illumina | F1 | 16.3 | 45bp:64106936  | SRX006155 | SRR933577 |
| DGRP_439 | Illumina | F1 | 20.4 | 95bp:44762436  | SRX021244 | SRR835028 |
| DGRP_440 | Illumina | F1 | 17.2 | 95bp:43161850  | SRX021246 | SRR835029 |
| DGRP_441 | Illumina | F1 | 18.7 | 95bp:42278010  | SRX023835 | SRR835030 |
| DGRP_443 | Illumina | F1 | 28.5 | 95bp:57567568  | SRX021260 | SRR835031 |
| DGRP_461 | Illumina | F1 | 21.9 | 95bp:49324528  | SRX021262 | SRR835033 |
| DGRP_491 | Illumina | F1 | 15.1 | 75bp:40944392  | SRX021268 | SRR835035 |
| DGRP_492 | Illumina | F1 | 22.1 | 95bp:44580310  | SRX021270 | SRR835036 |
| DGRP_502 | Illumina | F1 | 21.7 | 95bp:44336646  | SRX021271 | SRR835038 |
| DGRP_505 | Illumina | F2 | 43.7 | 125bp:71295212 | SRX156002 | SRR835039 |
| DGRP_508 | Illumina | F1 | 21.2 | 95bp:42338556  | SRX021272 | SRR835040 |
| DGRP_509 | Illumina | F1 | 15.3 | 75bp:38095912  | SRX021273 | SRR835041 |
| DGRP_513 | Illumina | F1 | 19.6 | 95bp:42640722  | SRX021282 | SRR835042 |
| DGRP_528 | Illumina | F2 | 36.2 | 125bp:57697778 | SRX155985 | SRR835043 |
| DGRP_530 | Illumina | F2 | 20.7 | 125bp:34726088 | SRX156031 | SRR835044 |
| DGRP_531 | Illumina | F1 | 17.9 | 95bp:41560152  | SRX021290 | SRR835045 |
| DGRP_535 | Illumina | F1 | 15.2 | 75bp:40234802  | SRX021293 | SRR835046 |
| DGRP_551 | Illumina | F2 | 21.4 | 125bp:35225968 | SRX156034 | SRR835047 |
| DGRP_555 | Illumina | F1 | 19.2 | 75bp:50103810  | SRX006159 | SRR933580 |
| DGRP_559 | Illumina | F2 | 24.2 | 125bp:36482062 | SRX156032 | SRR835048 |
| DGRP_566 | Illumina | F2 | 48.8 | 101bp:89414580 | SRX156033 | SRR835050 |

|          |          |    |      |                 |           |           |
|----------|----------|----|------|-----------------|-----------|-----------|
| DGRP_596 | Illumina | F2 | 41.1 | 101bp:73915046  | SRX156004 | SRR835096 |
| DGRP_627 | Illumina | F2 | 36.7 | 125bp:82297368  | SRX155988 | SRR835097 |
| DGRP_630 | Illumina | F2 | 21.7 | 125bp:36162916  | SRX156003 | SRR835098 |
| DGRP_634 | Illumina | F2 | 19.4 | 125bp:32632568  | SRX156018 | SRR835086 |
| DGRP_705 | Illumina | F1 | 16.7 | 75bp:47006608   | SRX006162 | SRR933585 |
| DGRP_707 | Illumina | F1 | 17.8 | 75bp:46657404   | SRX006163 | SRR933586 |
| DGRP_712 | Illumina | F1 | 16.3 | 75bp:44687868   | SRX006164 | SRR933587 |
| DGRP_727 | Illumina | F1 | 27.5 | 75bp:73781476   | SRX021382 | SRR933589 |
| DGRP_732 | Illumina | F1 | 16.3 | 75bp:42170344   | SRX006167 | SRR933591 |
| DGRP_737 | Illumina | F1 | 25.1 | 75bp:74740132   | SRX023451 | SRR933592 |
| DGRP_738 | Illumina | F1 | 27.1 | 75bp:75804508   | SRX021383 | SRR933593 |
| DGRP_757 | Illumina | F1 | 28.4 | 75bp:74326240   | SRX021385 | SRR933594 |
| DGRP_761 | Illumina | F1 | 15.2 | 75bp:40867250   | SRX021386 | SRR835088 |
| DGRP_776 | Illumina | F1 | 15.6 | 75bp:39890986   | SRX021387 | SRR835089 |
| DGRP_787 | Illumina | F1 | 15.4 | 75bp:39795416   | SRX021388 | SRR835091 |
| DGRP_790 | Illumina | F1 | 17.0 | 95bp:35620658   | SRX021389 | SRR835092 |
| DGRP_805 | Illumina | F1 | 16.1 | 75bp:43182102   | SRX021400 | SRR835095 |
| DGRP_810 | Illumina | F1 | 15.5 | 75bp:36972402   | SRX021418 | SRR835051 |
| DGRP_812 | Illumina | F1 | 16.1 | 75bp:38719004   | SRX021419 | SRR835052 |
| DGRP_819 | Illumina | F2 | 73.0 | 100bp:150745358 | SRX156006 | SRR835054 |
| DGRP_822 | Illumina | F1 | 17.7 | 110bp:41079524  | SRX021476 | SRR835055 |
| DGRP_837 | Illumina | F1 | 20.7 | 95bp:46411538   | SRX021479 | SRR933599 |
| DGRP_843 | Illumina | F2 | 42.3 | 125bp:68658714  | SRX156036 | SRR835059 |
| DGRP_849 | Illumina | F2 | 39.9 | 125bp:61687178  | SRX156035 | SRR835060 |
| DGRP_850 | Illumina | F2 | 43.6 | 125bp:69699750  | SRX155993 | SRR835061 |
| DGRP_855 | Illumina | F1 | 19.2 | 110bp:42348166  | SRX021563 | SRR835062 |
| DGRP_857 | Illumina | F1 | 20.8 | 110bp:42340250  | SRX021492 | SRR835063 |
| DGRP_882 | Illumina | F1 | 17.4 | 75bp:44722234   | SRX021496 | SRR835067 |
| DGRP_887 | Illumina | F1 | 19.5 | 95bp:43595728   | SRX021527 | SRR835069 |
| DGRP_890 | Illumina | F1 | 15.9 | 75bp:41954706   | SRX021499 | SRR835071 |
| DGRP_892 | Illumina | F1 | 20.5 | 95bp:45702226   | SRX023838 | SRR835072 |
| DGRP_894 | Illumina | F1 | 16.8 | 95bp:35128536   | SRX021528 | SRR835073 |
| DGRP_897 | Illumina | F1 | 27.0 | 75bp:70892788   | SRX023457 | SRR933601 |
| DGRP_907 | Illumina | F1 | 17.5 | 95bp:36385056   | SRX021500 | SRR835074 |

|          |          |    |      |                |           |           |
|----------|----------|----|------|----------------|-----------|-----------|
| DGRP_908 | Illumina | F1 | 19.9 | 95bp:39111536  | SRX021501 | SRR835075 |
| DGRP_913 | Illumina | F2 | 43.7 | 125bp:69250292 | SRX156024 | SRR835077 |

**Supplementary Table 6:** DGRP sequencing data used for *D. Melanogaster* mapping and variant calling experiments
